# Supplementary material for: How does domestic migration pose a challenge in achieving equitable social health insurance benefits in China? A national cross-sectional study
Source: HighWire-hosted journal article supplement (doi:10.1136/bmjopen-2021-060551), 2022-08-01
Supplement: bmjopen-2021-060551supp001_data_supplement.pdf [file bmjopen-2021-060551supp001_data_supplement.pdf]

**Appendix Table 1 Characteristics of the study sample by migration scope**

|                                                | Across counties<br>within a city | Across cities<br>within a province | Across provinces        | F/ $\chi^2$ | P<br>value |
|------------------------------------------------|----------------------------------|------------------------------------|-------------------------|-------------|------------|
| Age (Years) *                                  | 38.41( $\pm$ 10.35)              | 37.99( $\pm$ 9.62)                 | 37.01 ( $\pm$ 9.47)     | 2.248       | 0.106      |
| Female                                         | 137(46.28%)                      | 154(46.0%)                         | 241(45.13%)             | 0.12        | 0.942      |
| Married                                        | 262(88.51%)                      | 298(88.96%)                        | 480(89.89%)             | 0.424       | 0.809      |
| Education attainment                           |                                  |                                    |                         | 6.979       | 0.323      |
| Primary school and below                       | 72(24.32%)                       | 78(23.28%)                         | 129(24.16%)             |             |            |
| Junior high school                             | 137(46.28%)                      | 154(45.97%)                        | 263(49.25%)             |             |            |
| Senior high school                             | 64(21.62%)                       | 62(18.51%)                         | 86(16.10%)              |             |            |
| College and above                              | 23(7.77%)                        | 41(12.24%)                         | 56(10.49%)              |             |            |
| Monthly household income<br>per capita (Yuan)* | 1830.88( $\pm$ 1272.07)          | 1968.94( $\pm$ 1589.62)            | 2672.67( $\pm$ 2600.04) | 20.506      | 0.000      |
| Having any job                                 | 226(76.35%)                      | 264(78.81%)                        | 437(81.84%)             | 3.692       | 0.158      |
| Rural Hukou                                    | 268(90.54%)                      | 293(87.46%)                        | 462(86.52%)             | 2.934       | 0.231      |
| Living in an urban area                        | 237(80.07%)                      | 241(71.94%)                        | 330(61.80%)             | 31.386      | 0.000      |
| Reasons for migration                          |                                  |                                    |                         | 8.13        | 0.087      |
| Seeking jobs                                   | 242(81.76%)                      | 273(81.49%)                        | 466(87.27%)             |             |            |
| Family members<br>following migrants           | 44(14.86%)                       | 51(15.22%)                         | 51(9.55%)               |             |            |
| Other reasons                                  | 10(3.38%)                        | 11(3.28%)                          | 17(3.18%)               |             |            |
| Migration duration (Years)                     |                                  |                                    |                         | 10.475      | 0.106      |
| 0~1                                            | 43(14.53%)                       | 32(9.55%)                          | 72(13.48%)              |             |            |
| 1~5                                            | 135(45.61%)                      | 135(40.30%)                        | 214(40.07)              |             |            |
| 5~10                                           | 65(21.96%)                       | 80(23.88%)                         | 127(23.78%)             |             |            |
| 10 +                                           | 53(17.91%)                       | 88(26.27%)                         | 121(22.66%)             |             |            |
| Social health insurance<br>programs            |                                  |                                    |                         | 8.376       | 0.079      |
| NCMS                                           | 216(72.97%)                      | 214(63.88%)                        | 347(64.98%)             |             |            |
| URBMI                                          | 28(9.50%)                        | 39(11.64%)                         | 53(9.93%)               |             |            |
| UEBMI                                          | 52(17.57%)                       | 82(24.48%)                         | 134(25.09%)             |             |            |

Note: \* mean ( $\pm$  Standard Deviation).
